# Supplementary material for: Insights into the Resistome and Phylogenomics of a ST195 Multidrug-Resistant Acinetobacter baumannii Clinical Isolate from the Czech Republic
Source: MDPI journal article supplement (doi:10.3390/life11101079), 2021-10-13
Supplement: s1 [file s1]

# Supplementary

**Table S1.** Primers used to detect the  $\beta$ -lactamase genes using PCR.

| Primer Name | Sequence (5' to 3' direction) <sup>a</sup>              | Target       | Amplicon Size (bp) | T <sub>m</sub> (°C) | Reference  |
|-------------|---------------------------------------------------------|--------------|--------------------|---------------------|------------|
| ADC-F1/R1   | MAACCTAAAAACYCAATCGGTG,<br>YGGATAAGMAAACTCTTCCCA        | ADC          | 417                | 58                  | [1]        |
| ADC-F2/R2   | RGGTTTCTAYCAAGTCGGYA,<br>GCGTTCTTCATTBGGGAATACGT        |              | 268                | 59                  | [1]        |
| CARB-F/R    | GGGAAAACGTTGGGAACAT,<br>TAATAGCACGCGACCCATA             | CARB         | 578                | 54                  | [1]        |
| CTX-F1/R1   | ATGTGCAGYACCAGTAARGT,<br>TGGGTRAARTARGTSACCAGA          | CTX          | 593                | 55                  | [2]        |
| CTX-F2/R2   | ATGTGCAGYACCAGYAAAG,<br>GGCCARATCACCGRATAT              |              | 551                | 56                  | [1]        |
| GES-F/R     | ACGTTCAAGTTTCCGCTAG,<br>GGCAACTAATTCGTCACGT             | GES          | 624                | 53                  | [3]        |
| IMP-F/R     | GAGTGGCTTAATTCTCRATC,<br>CCAAACYACTASGTTATCT            | IMP          | 183                | 50                  | [4]        |
| KPC-F/R     | CGCTAAACTCGAACAGGAC,<br>CGGTCGTGTTTCCCTTTAG             | KPC          | 548                | 54                  | [1]        |
| NDM-F/R     | GGGGATTGCGACTTATGC,<br>AGATTGCCGAGCGACTTG               | NDM          | 258                | 53                  | [5]        |
| OXA(1)-F/R  | ATTTCAAGCCAAAGGCACGA,<br>GCCACTCAACCCATCCTACC           | OXA-2-like   | 569                | 57                  | [6]        |
| OXA(2)-F/R  | ACTTGCTATGTGGTTGCTTCTC,<br>ACCTTTTCTCGCCCTTCCAT         | OXA-23-like  | 310                | 56                  | [5]        |
| OXA(3)-F/R  | GCAGAAAGAAGTAAAGCGGG,<br>CCAACCAGTCAACCAACCT            | OXA-24-like  | 271                | 54                  | [5]        |
| OXA(4)-F/R  | AACGGGCGAACCAAGCATTTT,<br>TGAGCACTTCTTTTGTGATGGCT       | OXA-48-like  | 597                | 57                  | [6]        |
| OXA(5)-F/R  | TGTACCTGCTTCGACCTTCA,<br>TCCCCAACCCTTTTTCGCT            | OXA-51-like  | 436                | 54                  | [6]        |
| OXA(6)-F/R  | TAGACCGAGCAAAAACAGC,<br>CAATTGCCCTTGGGCTAAA             | OXA-58-like  | 365                | 52                  | [7]        |
| OXA(7)-F/R  | CCTCTCAAATCACTTCAACTCAATCT,<br>GCTGCAAACTGCGCTTCTT      | OXA-134-like | 253                | 58                  | [5]        |
| OXA(8)-F/R  | ACGAGCACATACAGAATATGTCCC,<br>CCATTAGATTTTTCTACCCAACCTGT | OXA-143-like | 510                | 59                  | [5]        |
| OXA(9)-F/R  | CTACGGCAATGACTTGAGCC,<br>CCTGATAAACGGGAACGGCA           | OXA-211-like | 209                | 57                  | [7]        |
| OXA(10)-F/R | ATRTTCCCGCCTCTACCTTT,<br>YATCCCATCCCCAACCRCTT           | OXA-213-like | 444                | 56                  | [7]        |
| OXA(11)-F/R | GCGTGAAGAAGTGAAGCGTGT,<br>TCAACATCCATTCCCCAACAC         | OXA-228-like | 243                | 57                  | [7]        |
| PER-F/R     | TACCTGGGCTCCGATAATG,<br>TTCGACCATCCACTTCCAT             | PER          | 336                | 54                  | This study |
| SHV-F/R     | AACAGCYGGAGCGAAAGAT,<br>CYTATCGGCGATAAACACAGC           | SHV          | 437                | 55                  | This study |
| TEM-F/R     | CACCAGTCACAGAAAAGCA,                                    | TEM          | 450                | 54                  | [1]        |

|         |                                               |     |     |    |     |
|---------|-----------------------------------------------|-----|-----|----|-----|
| VEB-F/R | AGGGCTTACCATCTGGC                             | VEB | 553 | 54 | [1] |
|         | TTTCCGATTGCTTTAGCCG,<br>CCCCAACATCATTAGTGGC   |     |     |    |     |
| VIM-F/R | CGCGGAGATTGARAAGCAAA,<br>CGCAGCACCRGGATAGAARA | VIM | 247 | 57 | [8] |

---

<sup>a</sup>For degenerate primers: B = C or G or T; M = A or C; R = A or G; S = G or C; Y = C or T.

**Table S2.** Distribution of locally colinear blocks (LCBs) of *Acinetobacter baumannii* AC30 relative to strain 11069/A.

| LCB | Size (bp) | Coordinates*          | GC (%) |
|-----|-----------|-----------------------|--------|
| 1   | 167,750   | 3 - 167,752           | 40.2   |
| 2   | 38,738    | 167,765 - 206,502     | 37.3   |
| 3   | 218,443   | 206,514 - 424,956     | 38.6   |
| 4   | 27,837    | 424,965 - 452,801     | 38.4   |
| 5   | 93,500    | 452,806 - 546,305     | 39.9   |
| 6   | 140,237   | 546,310 - 686,545     | 37.8   |
| 7   | 25,878    | 686,553 - 712,430     | 39.2   |
| 8   | 404,514   | 712,435 - 1,115,603   | 38.7   |
| 9   | 2,853     | 1,115,628 - 1,118,480 | 37.0   |
| 10  | 233,136   | 1,118,500 - 1,350,917 | 38.5   |
| 11  | 8,841     | 1,359,767 - 1,350,927 | 40.0   |
| 12  | 1,965     | 1,359,772 - 1,361,736 | 39.1   |
| 13  | 119,136   | 1,361,741 - 1,479,923 | 38.8   |
| 14  | 117,986   | 1,479,927 - 1,597,906 | 38.3   |
| 15  | 81,000    | 1,660,427 - 1,660,507 | 35.2   |
| 16  | 2,035     | 1,668,542 - 1,670,576 | 28.4   |
| 17  | 29,153    | 1,700,868 - 1,671,716 | 40.4   |
| 18  | 51,856    | 1,700,872 - 1,752,066 | 39.5   |
| 19  | 128,561   | 1,752,164 - 1,880,724 | 40.5   |
| 20  | 27,050    | 1,881,358 - 1,908,407 | 39.4   |
| 21  | 115,052   | 1,908,411 - 2,023,462 | 39.1   |
| 22  | 596,641   | 2,023,466 - 2,612,935 | 39.2   |
| 23  | 15,678    | 2,686,770 - 2,702,447 | 39.9   |
| 24  | 18,564    | 2,702,452 - 2,721,015 | 39.9   |
| 25  | 26,828    | 2,721,021 - 2,747,829 | 38.0   |
| 26  | 44,154    | 2,747,834 - 2,791,432 | 37.4   |
| 27  | 80,647    | 2,791,881 - 2,869,494 | 39.4   |
| 28  | 161,418   | 2,869,526 - 3,027,146 | 38.9   |
| 29  | 162,938   | 3,027,172 - 3,189,672 | 39.3   |
| 30  | 846       | 3,190,537 - 3,189,692 | 38.2   |
| 31  | 68,355    | 3,190,561 - 3,258,915 | 36.8   |
| 32  | 15,000    | 3,258,920 - 3,273,919 | 38.8   |
| 33  | 23,640    | 3,273,939 - 3,297,578 | 38.2   |
| 34  | 2,471     | 3,300,052 - 3,297,582 | 47.4   |
| 35  | 434       | 3,300,057 - 3,300,490 | 49.0   |
| 36  | 2,612     | 3,303,106 - 3,300,495 | 50.2   |
| 37  | 34,268    | 3,303,109 - 3,337,376 | 38.5   |

|    |        |                       |      |
|----|--------|-----------------------|------|
| 38 | 3,280  | 3,340,658 - 3,337,379 | 37.4 |
| 39 | 23,182 | 3,340,663 - 3,363,844 | 38.6 |
| 40 | 43,327 | 3,407,175 - 3,363,849 | 40.8 |
| 41 | 19,667 | 3,426,851 - 3,407,185 | 38.0 |
| 42 | 26,632 | 3,426,856 - 3,453,482 | 39.4 |
| 43 | 31,755 | 3,453,484 - 3,485,231 | 39.0 |
| 44 | 20,074 | 3,485,236 - 3,505,224 | 39.3 |
| 45 | 2,515  | 3,505,229 - 3,507,743 | 44.9 |
| 46 | 4,570  | 3,512,148 - 3,507,747 | 32.5 |
| 47 | 2,127  | 3,514,277 - 3,512,151 | 32.5 |
| 48 | 42,710 | 3,514,339 - 3,557,045 | 37.4 |
| 49 | 20,743 | 3,577,794 - 3,557,052 | 39.2 |
| 50 | 843    | 3,577,814 - 3,578,656 | 42.8 |
| 51 | 37,693 | 3,578,827 - 3,616,519 | 38.6 |
| 52 | 8,025  | 3,624,546 - 3,616,522 | 38.7 |
| 53 | 33,930 | 3,624,551 - 3,658,480 | 39.3 |
| 54 | 2,482  | 3,658,484 - 3,660,965 | 37.4 |
| 55 | 2,421  | 3,663,401 - 3,660,981 | 40.5 |
| 56 | 36,310 | 3,663,418 - 3,699,727 | 38.9 |
| 57 | 11,144 | 3,699,743 - 3,710,886 | 38.9 |
| 58 | 3,960  | 3,710,898 - 3,714,857 | 38.1 |
| 59 | 7,654  | 3,722,515 - 3,714,862 | 37.0 |
| 60 | 36,420 | 3,722,532 - 3,758,644 | 38.5 |
| 61 | 10,140 | 3,768,788 - 3,758,649 | 38.1 |
| 62 | 803    | 3,769,613 - 3,768,811 | 43.2 |
| 63 | 821    | 3,769,630 - 3,770,450 | 43.1 |
| 64 | 3,515  | 3,770,577 - 3,774,091 | 36.4 |
| 65 | 1,126  | 3,774,113 - 3,775,238 | 35.8 |
| 66 | 2,099  | 3,775,242 - 3,777,340 | 41.4 |
| 67 | 3,887  | 3,781,237 - 3,777,351 | 37.2 |
| 68 | 2,960  | 3,784,886 - 3,781,927 | 33.0 |
| 69 | 5,241  | 3,790,338 - 3,785,098 | 38.7 |
| 70 | 1,305  | 3,790,340 - 3,791,644 | 39.5 |
| 71 | 18,158 | 3,791,675 - 3,809,386 | 37.5 |
| 72 | 3,606  | 3,813,022 - 3,809,417 | 36.2 |
| 73 | 7,705  | 3,813,027 - 3,820,731 | 36.9 |
| 74 | 1,263  | 3,820,770 - 3,822,010 | 44.1 |
| 75 | 1,610  | 3,823,198 - 3,824,807 | 48.9 |
| 76 | 962    | 3,826,505 - 3,825,544 | 44.9 |

\*Relative to the *A. baumannii* AC30 chromosome.

**Table S3.** The presence of gaps of the *Acinetobacter* strains studied.

| Gap | AC30      |        | 11069/A   |        |
|-----|-----------|--------|-----------|--------|
|     | Size (bp) | GC (%) | Size (bp) | GC (%) |
| 1   | 1         | 100.0  | 1         | 100.0  |

|    |    |      |     |       |
|----|----|------|-----|-------|
| 2  | 1  | 0.0  | 1   | 0.0   |
| 3  | 2  | 50.0 | 1   | 0.0   |
| 4  | 2  | 50.0 | 1   | 100.0 |
| 5  | 2  | 50.0 | 2   | 0.0   |
| 6  | 2  | 50.0 | 2   | 50.0  |
| 7  | 2  | 50.0 | 2   | 0.0   |
| 8  | 3  | 66.7 | 3   | 0.0   |
| 9  | 3  | 33.3 | 3   | 66.7  |
| 10 | 3  | 66.7 | 3   | 33.3  |
| 11 | 3  | 0.0  | 4   | 25.0  |
| 12 | 3  | 33.3 | 6   | 33.3  |
| 13 | 3  | 33.3 | 17  | 64.7  |
| 14 | 3  | 33.3 | 60  | 41.7  |
| 15 | 3  | 33.3 | 108 | 33.3  |
| 16 | 4  | 0.0  | 119 | 35.3  |
| 17 | 4  | 25.0 | 129 | 53.5  |
| 18 | 4  | 25.0 | 136 | 52.2  |
| 19 | 4  | 25.0 | 148 | 20.3  |
| 20 | 4  | 50.0 | 158 | 44.3  |
| 21 | 4  | 0.0  | 170 | 32.4  |
| 22 | 4  | 0.0  | 194 | 30.4  |
| 23 | 4  | 0.0  | 199 | 34.7  |
| 24 | 4  | 50.0 | 224 | 43.8  |
| 25 | 4  | 50.0 | 230 | 43.9  |
| 26 | 4  | 25.0 | 241 | 41.9  |
| 27 | 4  | 25.0 | 245 | 48.2  |
| 28 | 4  | 25.0 | 251 | 41.8  |
| 29 | 4  | 25.0 | 273 | 37.7  |
| 30 | 4  | 0.0  | 284 | 39.4  |
| 31 | 4  | 25.0 | 305 | 32.2  |
| 32 | 4  | 75.0 | 377 | 41.1  |
| 33 | 4  | 25.0 | 428 | 46.3  |
| 34 | 4  | 25.0 | 437 | 39.8  |
| 35 | 5  | 20.0 | 446 | 30.7  |
| 36 | 6  | 0.0  | 449 | 41.9  |
| 37 | 7  | 42.9 | 451 | 39.2  |
| 38 | 8  | 50.0 | 465 | 39.6  |
| 39 | 9  | 11.1 | 466 | 30.5  |
| 40 | 9  | 44.4 | 487 | 42.3  |
| 41 | 10 | 50.0 | 490 | 37.5  |
| 42 | 11 | 18.2 | 492 | 43.1  |
| 43 | 11 | 54.5 | 498 | 41.7  |
| 44 | 12 | 25.0 | 503 | 41.4  |
| 45 | 15 | 53.3 | 523 | 43.0  |
| 46 | 15 | 26.7 | 528 | 53.4  |

|    |        |      |         |      |
|----|--------|------|---------|------|
| 47 | 16     | 25.0 | 596     | 40.9 |
| 48 | 16     | 25.0 | 647     | 37.6 |
| 49 | 16     | 37.5 | 736     | 42.0 |
| 50 | 19     | 42.1 | 781     | 42.3 |
| 51 | 19     | 57.9 | 826     | 38.4 |
| 52 | 19     | 26.3 | 936     | 38.5 |
| 53 | 19     | 36.8 | 962     | 39.2 |
| 54 | 21     | 38.1 | 994     | 47.2 |
| 55 | 22     | 36.4 | 997     | 43.3 |
| 56 | 23     | 34.8 | 1,021   | 42.5 |
| 57 | 24     | 54.2 | 1,165   | 41.0 |
| 58 | 25     | 28.0 | 1,490   | 37.6 |
| 59 | 30     | 36.7 | 1,607   | 35.0 |
| 60 | 30     | 33.3 | 1,766   | 38.6 |
| 61 | 31     | 45.2 | 1,798   | 42.0 |
| 62 | 38     | 42.1 | 1,932   | 51.8 |
| 63 | 61     | 26.2 | 1,990   | 40.6 |
| 64 | 97     | 64.9 | 2,419   | 42.8 |
| 65 | 126    | 35.7 | 2,735   | 36.7 |
| 66 | 170    | 43.5 | 3,412   | 41.6 |
| 67 | 211    | 41.7 | 3,630   | 43.7 |
| 68 | 448    | 41.5 | 3,963   | 47.9 |
| 69 | 633    | 41.4 | 4,428   | 46.9 |
| 70 | 689    | 41.9 | 4,620   | 39.8 |
| 71 | 736    | 47.4 | 11,256  | 42.4 |
| 72 | 1,139  | 35.5 | 15,800  | 39.5 |
| 73 | 1,187  | 38.2 | 21,402  | 34.2 |
| 74 | 8,034  | 38.5 | 37,788  | 41.1 |
| 75 | 62,520 | 38.3 | 103,465 | 38.5 |
| 76 | 73,834 | 37.6 |         |      |

**Table S4.** The presence of mobile genetic elements including insertion sequences (ISs) identified on the gaps of the *Acinetobacter* strains studied.

| The Insertion Sequences                  |      |         |
|------------------------------------------|------|---------|
| IS Family                                | AC30 | 11069/A |
| IS1-like                                 | 0    | 2       |
| IS4-like element                         | 2    | 14      |
| IS5                                      | 0    | 1       |
| IS6-like element IS26 family transposase | 0    | 7       |
| IS30                                     | 0    | 2       |
| IS66                                     | 0    | 3       |
| Transposase                              | 0    | 10      |
| Mobile element                           | 0    | 3       |
| In total                                 | 2    | 42      |

**Table S5.** Genomes of *Acinetobacter baumannii* ST195<sup>Ox</sup> isolates used in this study.

| Strain  | Geographical Location | Size (Mb) | Year Isolation | Accession Number |
|---------|-----------------------|-----------|----------------|------------------|
| 11069/A | Czech Republic        | 3.81861   | 2018           | PRJNA728954      |
| AB07    | India                 | 4.24261   | 2011           | CP006963         |
| AC12    | Malaysia              | 3.85523   | 2011           | CP007549         |
| AC30    | Malaysia              | 3.92286   | 2011           | CP007577         |
| Ab-3    | China                 | 3.92776   | 2016           | SVUL00000000     |
| AB263   | Saudi Arabia          | 3.97315   | 2012           | LYNI00000000     |
| ABE12_M | Morocco               | 3.90253   | 2015           | FPEF00000000     |
| AC_2355 | Lebanon               | 4.02376   | 2016           | MJBA00000000     |
| CCF1    | USA                   | 3.94584   | 2015           | LYZL00000000     |
| 2012046 | China                 | 3.80122   | 2012           | NDXK00000000     |
| T173    | Thailand              | 3.93684   | 2010           | JRTY00000000     |

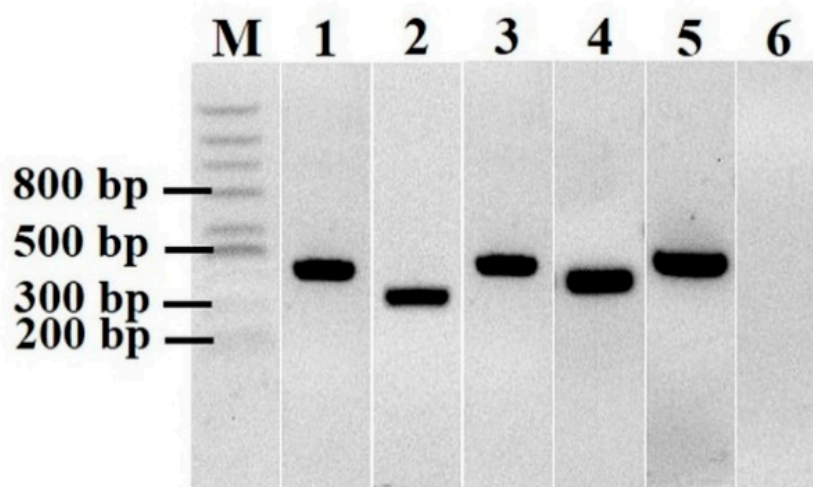

**Figure S1.** PCR products obtained by amplification of  $\beta$ -lactamase genes using specific primers in a clinical isolate 11069/A of *Acinetobacter baumannii*. Notes, lane 1, *bla*<sub>ADC</sub>-like gene (using the ADC-F1/R1 primers); lane 2, *bla*<sub>OXA-23</sub> gene (OXA(2)-F/R primers); lane 3, *bla*<sub>OXA-51</sub>-like gene (OXA(5)-F/R primers); lane 4, *bla*<sub>OXA-58</sub>-like gene (OXA(6)-F/R primers); lane 5, *bla*<sub>TEM</sub>-like gene; lane 6, negative control. M, molecular mass markers (200–1500 bp DNA ladder). The other 18 gene products (*bla*<sub>CARB</sub>-like, *bla*<sub>CTX-M</sub>-like, *bla*<sub>GES</sub>-like, *bla*<sub>IMP</sub>-like, *bla*<sub>KPC</sub>-like, *bla*<sub>NDM</sub>-like, *bla*<sub>OXA-2</sub>-like, *bla*<sub>OXA-24</sub>-like, *bla*<sub>OXA-48</sub>-like, *bla*<sub>OXA-134</sub>-like, *bla*<sub>OXA-143</sub>-like, *bla*<sub>OXA-211</sub>-like, *bla*<sub>OXA-213</sub>-like, *bla*<sub>OXA-228</sub>-like, *bla*<sub>PER</sub>-like, *bla*<sub>SHV</sub>-like, *bla*<sub>VEB</sub>-like, and *bla*<sub>VIM</sub>-like) were not generated with the DNA from this sample (data not shown).

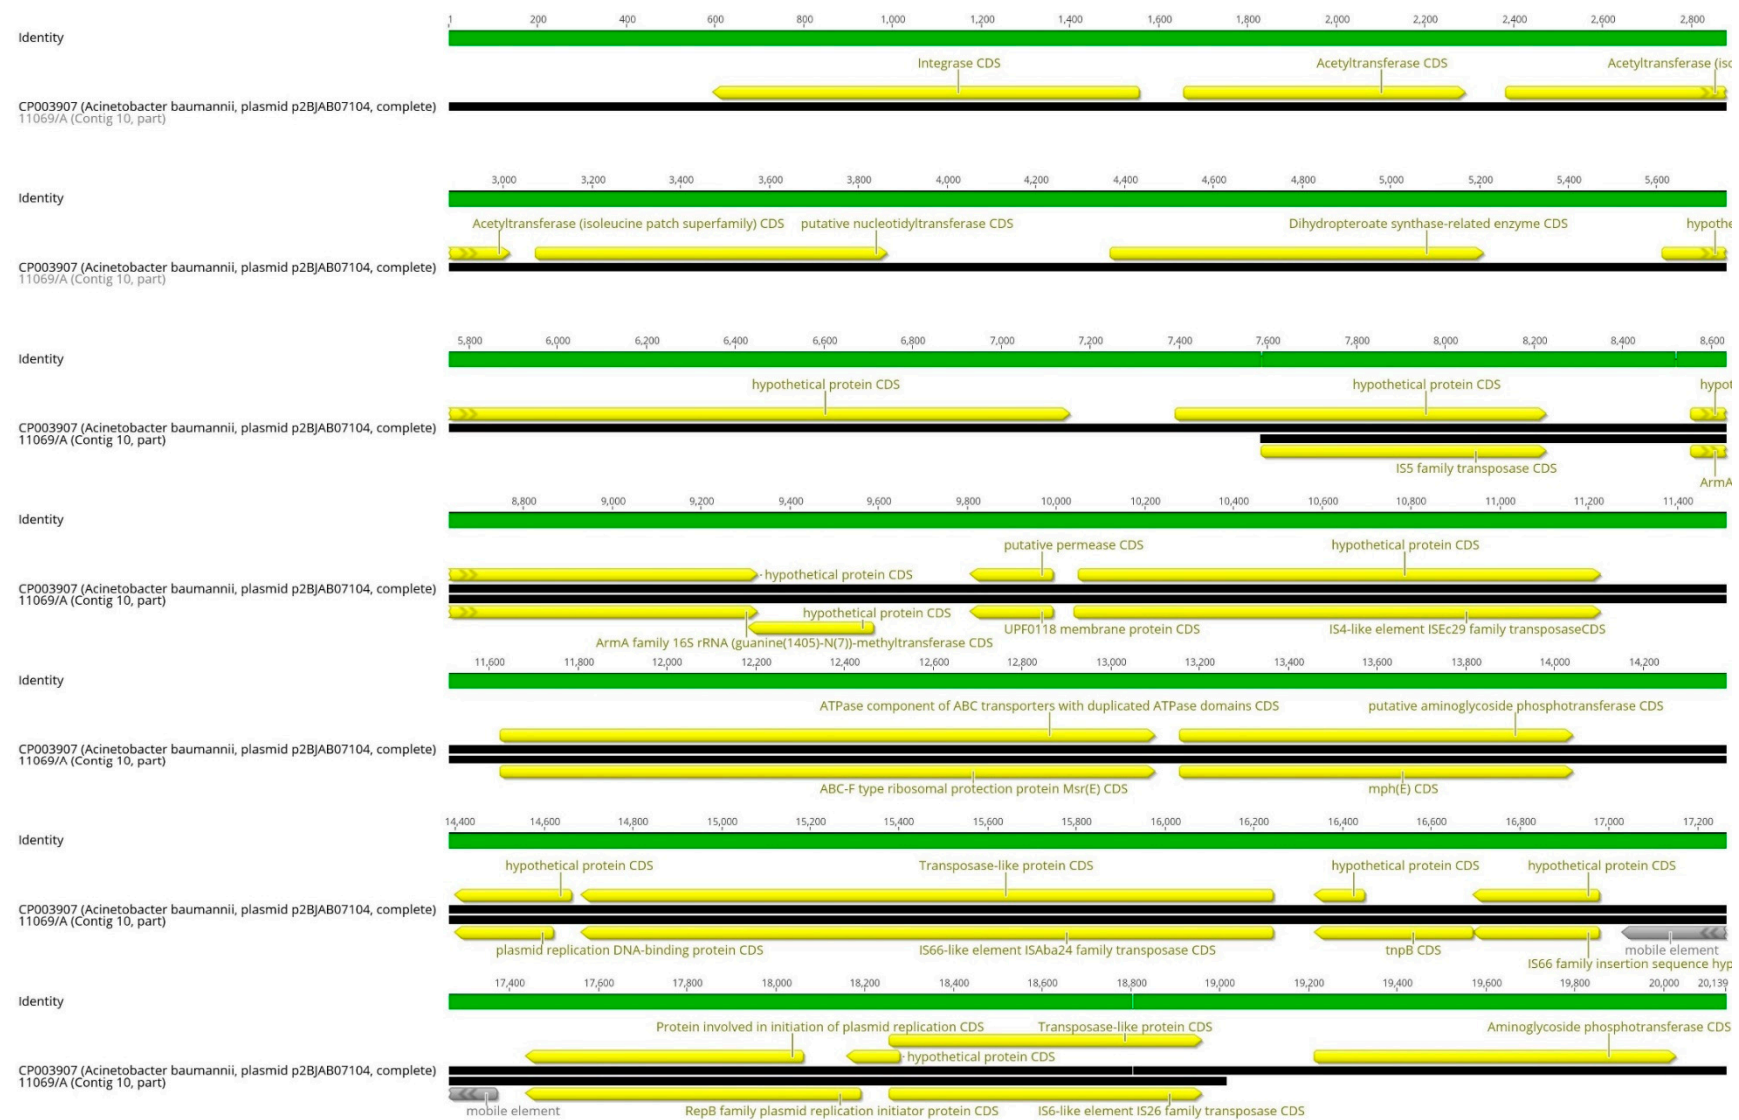

Figure

S2. Linear comparison of the complete nucleotide sequence of plasmid p2BJAB07104 from *Acinetobacter baumannii* BJA07104 with putative plasmid found in this study. The arrows indicate the positions and direction of transcription of the genes. Sequence comparison and map generation were performed using Geneious.

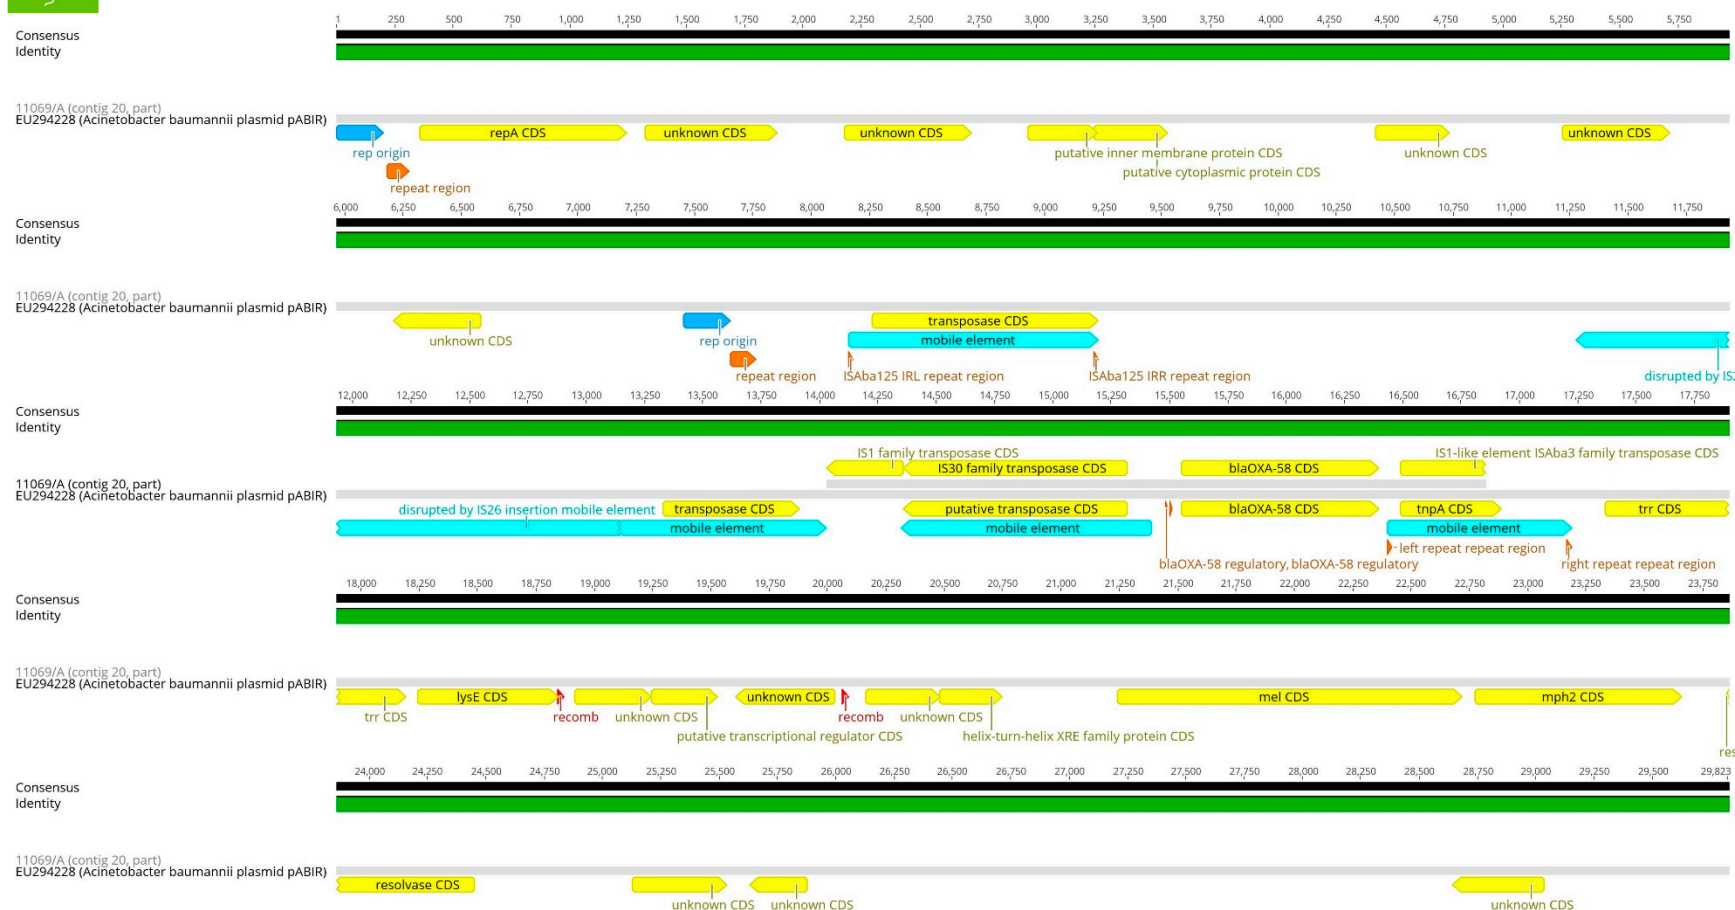

**Figure S3.** Linear comparison of the complete nucleotide sequence of plasmid pABIR from *Acinetobacter baumannii* with putative plasmid found in this study. The arrows indicate the positions and direction of transcription of the genes. Sequence comparison and map generation were performed using Geneious.



## References

1. Mlynarcik, P.; Dolejska, M.; Vagnerova, I.; Kutilova, I.; Kolar, M. Detection of clinically important beta-lactamases by using PCR. *FEMS Microbiol Lett* **2021**, *368*, doi:10.1093/femsle/fnab068.
2. Pagani, L.; Dell'Amico, E.; Migliavacca, R.; D'Andrea, M.M.; Giacobone, E.; Amicosante, G.; Romero, E.; Rossolini, G.M. Multiple CTX-M-Type extended-spectrum b-lactamases in nosocomial isolates of *Enterobacteriaceae* from a hospital in northern Italy. *Journal of Clinical Microbiology* **2003**, *41*, 4264–4269, doi:10.1128/Jcm.41.9.4264-4269.2003.
3. Kolar, M.; Htoutou Sedlakova, M.; Urbanek, K.; Mlynarcik, P.; Roderova, M.; Hricova, K.; Mezerova, K.; Kucova, P.; Zapletalova, J.; Fiserova, K.; et al. Implementation of Antibiotic Stewardship in a University Hospital Setting. *Antibiotics (Basel)* **2021**, *10*, doi:10.3390/antibiotics10010093.
4. Poirel, L.; Nordmann, P. Genetic structures at the origin of acquisition and expression of the carbapenem-hydrolyzing oxacillinase gene bla(OXA-58) in *Acinetobacter baumannii*. *Antimicrob Agents Ch* **2006**, *50*, 1442–1448, doi:10.1128/Aac.50.4.1442-1448.2006.
5. Mlynarcik, P.; Bardon, J.; Htoutou Sedlakova, M.; Prochazkova, P.; Kolar, M. Identification of novel OXA-134-like beta-lactamases in *Acinetobacter lwoffii* and *Acinetobacter schindleri* isolated from chicken litter. *Biomed Pap Med Fac Univ Palacky Olomouc Czech Repub* **2019**, *163*, 141–146, doi:10.5507/bp.2018.037.
6. Mlynarcik, P.; Roderova, M.; Kolar, M. Primer Evaluation for PCR and its Application for Detection of Carbapenemases in *Enterobacteriaceae*. *Jundishapur J Microbiol* **2016**, *9*, e29314, doi:10.5812/jjm.29314.
7. Mlynarcik, P.; Chalachanova, A.; Vagnerova, I.; Holy, O.; Zatloukalova, S.; Kolar, M. PCR Detection of Oxacillinases in Bacteria. *Microb Drug Resist* **2020**, doi:10.1089/mdr.2019.0330.
8. Lee, C.R.; Lee, J.H.; Park, M.; Park, K.S.; Bae, I.K.; Kim, Y.B.; Cha, C.J.; Jeong, B.C.; Lee, S.H. Biology of *Acinetobacter baumannii*: Pathogenesis, Antibiotic Resistance Mechanisms, and Prospective Treatment Options. *Front Cell Infect Microbiol* **2017**, *7*, 55, doi:10.3389/fcimb.2017.00055.
